# Supplementary material for: Sequential microfluidic flow synthesis of CePO4 nanorods decorated with emission tunable quantum dots
Source: Royal Society of Chemistry journal article supplement (doi:10.1039/c005022a), 2010-01-01
Supplement: c005022a.pdf [file c005022a.pdf]

## Supporting Information

### Sequential microfluidic flow synthesis of CePO<sub>4</sub> nanorods decorated with emission tunable quantum dots

Jie Fang,<sup>\*a,b</sup> Cameron W. Evans,<sup>b</sup> Glen J. Willis,<sup>b</sup> David Sherwood,<sup>b</sup> Yanglong Guo,<sup>a</sup> Guanzhong Lu,<sup>a</sup> Colin L. Raston<sup>b</sup> and K. Swaminathan Iyer<sup>\*b</sup>

<sup>a</sup> Key Laboratory for Advanced Materials and Research Institute of Industrial Catalysis, East China University of Science and Technology, Shanghai 200237, P. R. China. E-mail: JF: [jjefang@cyllene.uwa.edu.au](mailto:jjefang@cyllene.uwa.edu.au)

<sup>b</sup> Centre for Strategic Nano-Fabrication, School of Biomedical, Biomolecular and Chemical Sciences The University of Western Australia, Crawley, WA 6009, Australia. Fax: +61 8 6488 8683; Tel: +61 8 6488 3045; E-mail: KSI: [swaminatha.iyer@uwa.edu.au](mailto:swaminatha.iyer@uwa.edu.au)

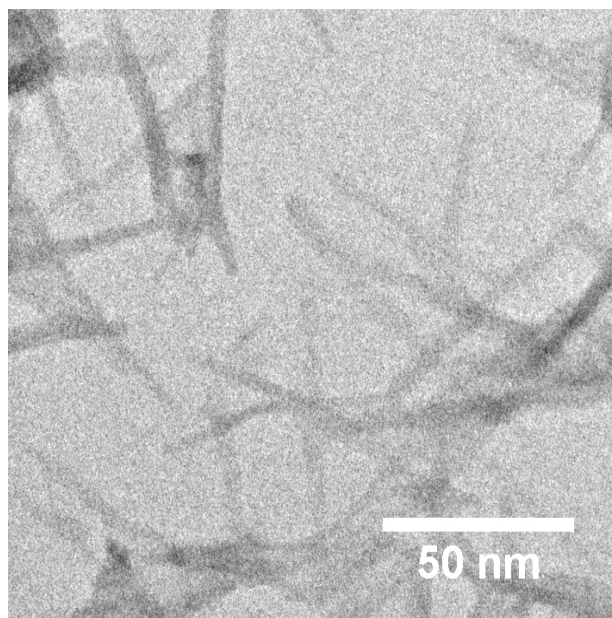

**Fig. S11** TEM image of CePO<sub>4</sub> nanorods produced by RTP.

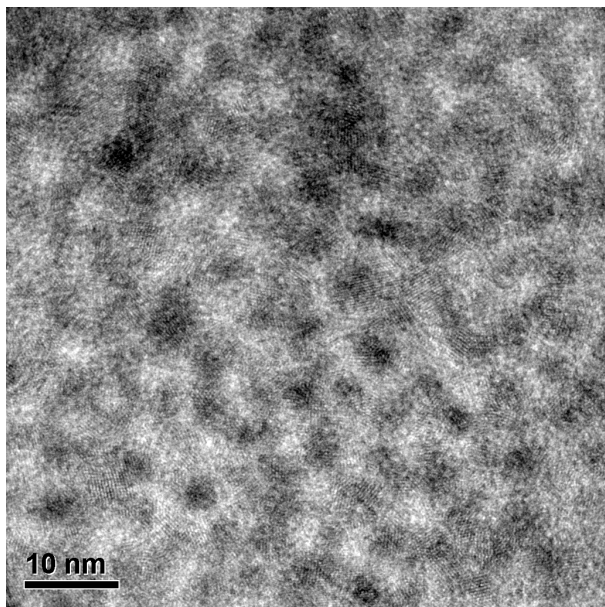

**Fig. SI2** TEM image of QDs prepared over 6 minutes by NCR.
